# Supplementary material
Source: publisher figshare collection journal article supplement (https://tandf.figshare.com/articles/dataset/_/9924677)
Supplement: Supplementary file 1 [file 1]

Archive with 3 entries (3 files):
- Supplementary material 1 - SCIM Self-Report (RHSCIR).pdf
- Supplementary material 2 - 10MWT (RHSCIR).pdf
- Supplementary material 3 - SWAT_V2.0Nov2014.pdf
