# Supplementary material
Source: publisher figshare collection journal article supplement (https://tandf.figshare.com/articles/dataset/_/9924677)
Supplement: Supplementary file 1 [file 1 › Supplementary material 2 - 10MWT (RHSCIR).pdf]

## CLINICAL INFORMATION: Standing & Walking Mobility

CI-Standing and Walking Mobility-10MWT-MULT

Page 1 of 1

### 10 Meter Walk Test

|                                                                                                                                                                                                                                                                                                                                                                                                                                      | ADMISSION<br>(Within 7 days)                                                                                                                                      | THRESHOLD<br>(Within 2 days of meeting criterion*)                                                                                                                          | DISCHARGE<br>(Within 7 days)                                                                                                                                     |
|--------------------------------------------------------------------------------------------------------------------------------------------------------------------------------------------------------------------------------------------------------------------------------------------------------------------------------------------------------------------------------------------------------------------------------------|-------------------------------------------------------------------------------------------------------------------------------------------------------------------|-----------------------------------------------------------------------------------------------------------------------------------------------------------------------------|------------------------------------------------------------------------------------------------------------------------------------------------------------------|
| <b>Date:</b><br>(If completed over multiple sessions, enter date of completion)                                                                                                                                                                                                                                                                                                                                                      | YYYY-MM-DD                                                                                                                                                        | YYYY-MM-DD                                                                                                                                                                  | YYYY-MM-DD                                                                                                                                                       |
| <b>Therapist Name/Initials:</b>                                                                                                                                                                                                                                                                                                                                                                                                      |                                                                                                                                                                   |                                                                                                                                                                             |                                                                                                                                                                  |
| <b>Did patient meet threshold criterion at time of assessment?</b><br><i>*Functional Walking Capacity:</i><br><br>3B)Independent Household Ambulator: ability to ambulate daily using reciprocal steps over ground for short distances (10-100m) independently for functional walking.<br><br><b>**Note: if patient doesn't meet threshold criterion at admission, please monitor and perform threshold test if function changes</b> | <input type="checkbox"/> Yes<br><input type="checkbox"/> No;<br>If No, enter current gait status:<br>_____<br>(e.g., ambulates with min. assist and walking belt) | <i>Only performed if patient does not meet threshold criterion at admission but function improves to meet threshold criterion at some time during their inpatient stay.</i> | <input type="checkbox"/> Yes<br><input type="checkbox"/> No<br>If No, enter current gait status:<br>_____<br>(e.g., ambulates with min. assist and walking belt) |
| <b>If patient met threshold criterion, but test not performed, specify reason:</b>                                                                                                                                                                                                                                                                                                                                                   | Reason:                                                                                                                                                           | Reason:                                                                                                                                                                     | Reason:                                                                                                                                                          |
| <b>Number of Sessions for Test Completion:</b><br><i>Note: Test can be completed over multiple sessions during the time period indicated if required.</i>                                                                                                                                                                                                                                                                            |                                                                                                                                                                   |                                                                                                                                                                             |                                                                                                                                                                  |

### 10 Meter Walk Test

| 10 Meter Walk Test |                                                                                                                      | ADMISSION (Within 7 days)<br><b>OR</b><br>THRESHOLD<br>(Within 2 days of meeting criterion*)<br>(Circle which test was done)                                                                                                                                                                                                                                                                                                                                                                                                                                                                                                                                                     |                   | DISCHARGE<br>(Within 7 days)                                                                                                                                                                                                                                                                                                                                                                                                                                                                                                                                                                                                                                                     |                   |
|--------------------|----------------------------------------------------------------------------------------------------------------------|----------------------------------------------------------------------------------------------------------------------------------------------------------------------------------------------------------------------------------------------------------------------------------------------------------------------------------------------------------------------------------------------------------------------------------------------------------------------------------------------------------------------------------------------------------------------------------------------------------------------------------------------------------------------------------|-------------------|----------------------------------------------------------------------------------------------------------------------------------------------------------------------------------------------------------------------------------------------------------------------------------------------------------------------------------------------------------------------------------------------------------------------------------------------------------------------------------------------------------------------------------------------------------------------------------------------------------------------------------------------------------------------------------|-------------------|
| 1.                 | <b>10 Meter Walk Test (10MWT) at preferred speed:</b>                                                                | Time:____(sec)                                                                                                                                                                                                                                                                                                                                                                                                                                                                                                                                                                                                                                                                   | Speed:____(m/sec) | Time:____(sec)                                                                                                                                                                                                                                                                                                                                                                                                                                                                                                                                                                                                                                                                   | Speed:____(m/sec) |
| 2.                 | <b>10 Meter Walk Test (10MWT) at maximum speed:</b>                                                                  | Time:____(sec)                                                                                                                                                                                                                                                                                                                                                                                                                                                                                                                                                                                                                                                                   | Speed:____(m/sec) | Time:____(sec)                                                                                                                                                                                                                                                                                                                                                                                                                                                                                                                                                                                                                                                                   | Speed:____(m/sec) |
| 3.                 | <b>Walking Aid Used:</b><br>(and circle right/left/both if applicable to indicate the side on which the aid is used) | <input type="checkbox"/> None<br><input type="checkbox"/> Parallel bars<br><input type="checkbox"/> Standard walker<br><input type="checkbox"/> 2 wheeled walker<br><input type="checkbox"/> 4 wheeled walker<br><input type="checkbox"/> Crutches –<br>Right / Left / Both<br><input type="checkbox"/> Quad cane<br><input type="checkbox"/> Standard cane –<br>Right / Left / Both<br><input type="checkbox"/> Knee Ankle Foot Orthosis (KAFO) –<br>Right/Left (if required bilaterally, patient does not meet threshold criteria for test)<br><input type="checkbox"/> Ankle Foot Orthosis -<br>Right / Left / Both<br><input type="checkbox"/> Other Aid (specify):<br>_____ |                   | <input type="checkbox"/> None<br><input type="checkbox"/> Parallel bars<br><input type="checkbox"/> Standard walker<br><input type="checkbox"/> 2 wheeled walker<br><input type="checkbox"/> 4 wheeled walker<br><input type="checkbox"/> Crutches –<br>Right / Left / Both<br><input type="checkbox"/> Quad cane<br><input type="checkbox"/> Standard cane –<br>Right / Left / Both<br><input type="checkbox"/> Knee Ankle Foot Orthosis (KAFO) –<br>Right/Left (if required bilaterally, patient does not meet threshold criteria for test)<br><input type="checkbox"/> Ankle Foot Orthosis -<br>Right / Left / Both<br><input type="checkbox"/> Other Aid (specify):<br>_____ |                   |

#### Data Collection Details (for RHSCIR study use only)

|                                             |  |                      |  |                                    |            |
|---------------------------------------------|--|----------------------|--|------------------------------------|------------|
| <b>Collected by:</b><br>(please print name) |  | <b>Initial Here:</b> |  | <b>Date Abstraction Completed:</b> | YYYY-MM-DD |
|---------------------------------------------|--|----------------------|--|------------------------------------|------------|
