# Supplementary material
Source: publisher figshare collection journal article supplement (https://tandf.figshare.com/articles/dataset/_/9924677)

## [ ASSESSMENT GUIDELINE ]

# Canadian SCI Standing and Walking Assessment Tool

The chart below indicates at which standing and walking stage specific assessments should begin to be collected.

The assessments required will include the ones indicated at the specific stage as well as all those indicated at the lower stages (For example, if the patient is at Stage 2A, it is necessary to complete the appropriate 2A assessments as well as assessments in Stage 1B).

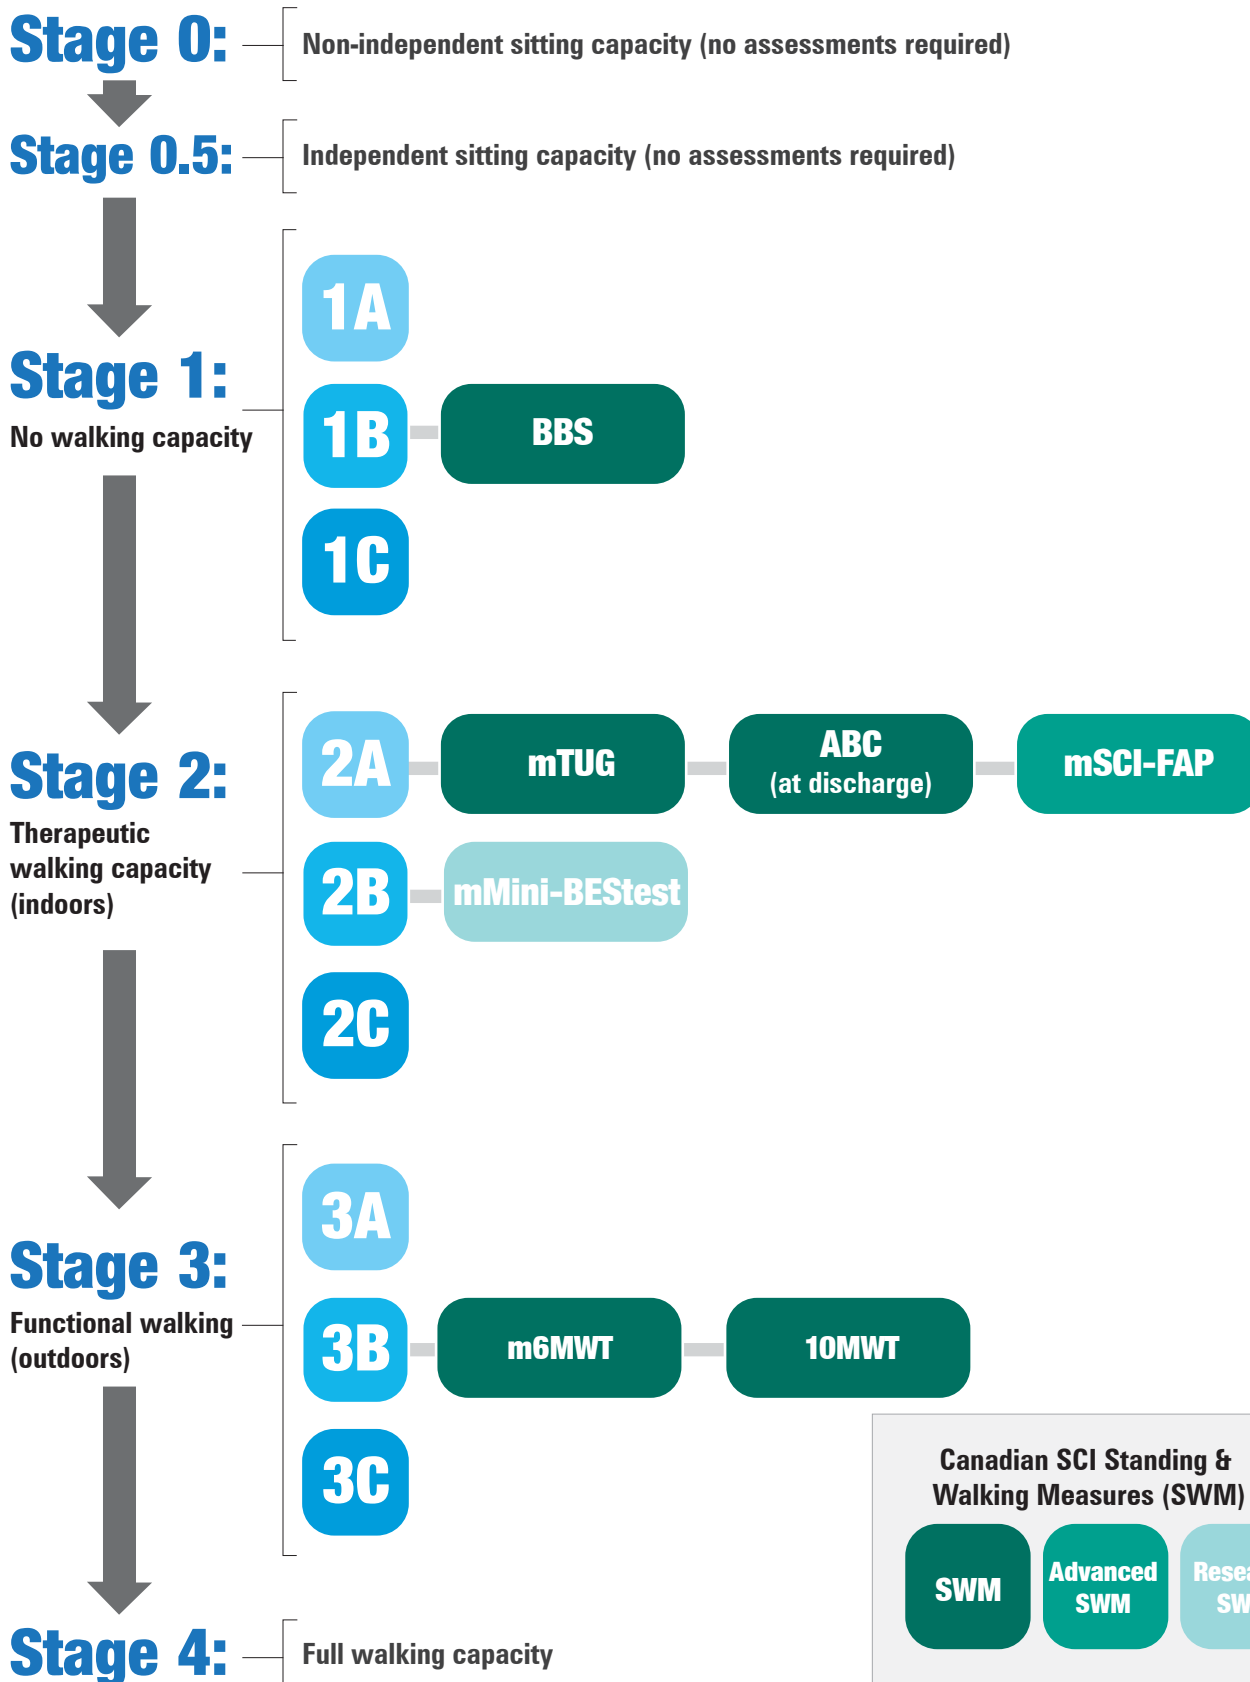

Supplement: Supplementary file 1 [file 1 › Supplementary material 3 - SWAT_V2.0Nov2014.pdf]
